# Supplementary material for: Comparative adipose transcriptome analysis digs out genes related to fat deposition in two pig breeds
Source: PubMed Central journal article supplement (PMC6733950; doi:10.1038/s41598-019-49548-5), 2019-09-09
Supplement: 41598_2019_49548_MOESM1_ESM.pdf [file 41598_2019_49548_MOESM1_ESM.pdf]

## **Comparative adipose transcriptome analysis digs out genes related to fat deposition in two pig breeds**

Kai Xing<sup>1,2#</sup>, Kejun Wang<sup>3#</sup>, Hong Ao<sup>4</sup>, Shaokang Chen<sup>5</sup>, Zhen Tan<sup>2</sup>, Yuan Wang<sup>2</sup>,  
Zhao Xitong<sup>2</sup>, Ting Yang<sup>2</sup>, Fengxia Zhang<sup>2</sup>, Yibing liu<sup>2</sup>, Hemin Ni<sup>1</sup>, Xihui Sheng<sup>1</sup>,  
Xiaolong Qi<sup>1</sup>, Xiangguo Wang<sup>1</sup>, Yong Guo<sup>1\*</sup> and Chuduan Wang<sup>2\*</sup>

<sup>1</sup>Animal Science and Technology College, Beijing University of Agriculture, Beijing 102206, China

<sup>2</sup>Key Laboratory of Animal Genetics, Breeding and Reproduction, Ministry of Agriculture, National Engineering Laboratory for Animal Breeding, College of Animal Science and Technology, China Agricultural University, Beijing 100193, China

<sup>3</sup>College of animal science and veterinary medicine, Henan Agricultural University, Zhengzhou, Henan, 450002, China

<sup>4</sup>State Key Laboratory for Animal Nutrition, Key Laboratory for Domestic Animal Genetic Resources and Breeding of the Ministry of Agriculture of China, Institute of Animal Science, Chinese Academy of Agricultural Sciences, Beijing 100193, China

<sup>5</sup>Beijing General Station of Animal Husbandry, Beijing 100125, China

# These authors contributed equally to this work.

\* Corresponding authors

YG: y63guo@126.com

CW: cdwang@cau.edu.cn

Table S3. DEGs related to lipid metabolism and adipogenesis

| Ensemble ID        | Gene<br>Symble | Gene title                                                                   | Function                                                                                                                                                                  | Log <sub>2</sub> (Fold<br>change) | FDR      |
|--------------------|----------------|------------------------------------------------------------------------------|---------------------------------------------------------------------------------------------------------------------------------------------------------------------------|-----------------------------------|----------|
| ENSSSCG00000018080 | ATP8           | ATP synthase F0 subunit 8                                                    | Metabolic pathways 、 Oxidative phosphorylation and citric acid (TCA) cycle                                                                                                | -4.22                             | 4.39E-13 |
| ENSSSCG00000024476 | CES3           | carboxylesterase 3                                                           | Metabolism of lipids and lipoproteins 、 Biological oxidations 、 LDL-mediated lipid transport 、 Lipid digestion, mobilization, and transport                               | -2.64                             | 1.80E-09 |
| ENSSSCG00000006719 | HSD3B1         | hydroxy-delta-5-steroid dehydrogenase, 3 beta- and steroid delta-isomerase 1 | Aldosterone synthesis and secretion 、 Glucocorticoid biosynthesis 、 Metabolism of lipids and lipoproteins 、 Metabolism of steroid hormones 、 Steroid hormone biosynthesis | -2.30                             | 1.29E-08 |
| ENSSSCG00000038521 | CHAC1          | ChaC glutathione specific gamma-glutamylcyclotransferase 1                   | Glutathione synthesis and recycling 、 Biological oxidation                                                                                                                | -1.86                             | 3.97E-06 |
| ENSSSCG00000040464 | LEP            | leptin                                                                       | Adipocytokine signaling pathway 、 AMPK signaling pathway、 Incretin synthesis                                                                                              | -1.57                             | 8.64E-04 |
| ENSSSCG00000039862 | TRIB3          | tribbles pseudokinase 3                                                      | Metabolism of lipids and lipoproteins                                                                                                                                     | -1.56                             | 1.46E-04 |
| ENSSSCG00000005638 | LCN2           | lipocalin 2                                                                  | Members of this family transport small hydrophobic molecules such as lipids, steroid hormones and retinoids.                                                              | -1.46                             | 1.91E-03 |
| ENSSSCG00000036438 | GPX3           | glutathione peroxidase 3                                                     | Arachidonic acid metabolism、 Glutathione metabolism                                                                                                                       | -1.45                             | 2.65E-03 |
| ENSSSCG00000000647 | OLR1           | oxidized low density lipoprotein receptor 1                                  | PPAR signaling pathway                                                                                                                                                    | -1.40                             | 4.93E-03 |
| ENSSSCG00000030345 | INPP5J         | inositol polyphosphate-5-phosphatase J                                       | Metabolism of lipids and lipoproteins                                                                                                                                     | -1.38                             | 2.78E-02 |
| ENSSSCG00000003138 | HSD17B14       | hydroxysteroid 17-beta dehydrogenase 14                                      | Metabolism of lipids and lipoproteins                                                                                                                                     | -1.31                             | 2.96E-03 |
| ENSSSCG00000015355 | DGKB           | diacylglycerol kinase beta                                                   | Glycerolipid metabolism 、 Glycerophospholipid                                                                                                                             | -1.24                             | 6.02E-03 |

|                    |         |                                                 |                                                                                                                                                       |       |          |
|--------------------|---------|-------------------------------------------------|-------------------------------------------------------------------------------------------------------------------------------------------------------|-------|----------|
| ENSSSCG0000006890  | ABCA4   | ATP binding cassette subfamily A member 4       | metabolism<br>active transport of a wide variety of substrates such as ions, sugars, lipids, sterols, peptides, proteins, and drugs                   | -1.23 | 2.72E-02 |
| ENSSSCG00000010055 | GGT5    | gamma-glutamyltransferase 5                     | Metabolism of lipids and lipoproteins                                                                                                                 | -1.18 | 3.80E-02 |
| ENSSSCG00000032843 | AHRR    | aryl-hydrocarbon receptor repressor             | Fatty acid, triacylglycerol, and ketone body metabolism、Metabolism of lipids and lipoproteins、PPARA activates gene expression                         | -1.16 | 1.19E-02 |
| ENSSSCG00000011297 | ABHD5   | abhydrolase domain containing 5                 | Lipid digestion, mobilization, and transport、Metabolism of lipids and lipoproteins、Regulation of lipolysis in adipocytes、triacylglycerol biosynthesis | -1.14 | 1.53E-02 |
| ENSSSCG00000028204 | TREH    | trehalase                                       | Metabolism of carbohydrates                                                                                                                           | -1.13 | 2.24E-02 |
| ENSSSCG00000000660 | A2M     | alpha-2-macroglobulin                           | Lipid digestion, mobilization, and transport、Lipoprotein metabolism、Metabolism of lipids and lipoproteins                                             | -1.13 | 3.43E-02 |
| ENSSSCG00000003788 | PTGER3  | prostaglandin E receptor 3                      | Regulation of lipolysis in adipocytes                                                                                                                 | -1.09 | 2.40E-02 |
| ENSSSCG00000011125 | GATA3   | GATA binding protein 3                          | Adipogenesis                                                                                                                                          | -1.07 | 2.82E-02 |
| ENSSSCG00000012889 | CHKA    | choline kinase alpha                            | Metabolism of lipids and lipoproteins                                                                                                                 | -1.06 | 2.76E-02 |
| ENSSSCG00000002828 | LPCAT2  | lysophosphatidylcholine acyltransferase 2       | Metabolism of lipids and lipoproteins                                                                                                                 | -1.05 | 3.35E-02 |
| ENSSSCG00000016877 | NNT     | nicotinamide nucleotide transhydrogenase        | Pyruvate metabolism and Citric Acid (TCA) cycle                                                                                                       | 1.00  | 4.65E-02 |
| ENSSSCG00000006848 | SLC25A2 | solute carrier family 25 member 24              | ATP transport、mitochondrial transport                                                                                                                 | 1.01  | 4.87E-02 |
| ENSSSCG00000016100 | NDUFB3  | NADH:ubiquinone oxidoreductase subunit B3       | Oxidative phosphorylation、the citric acid (TCA) cycle and respiratory electron transport                                                              | 1.03  | 4.61E-02 |
| ENSSSCG00000009259 | PAQR3   | progesterin and adipoQ receptor family member 3 | Insulin receptor signalling cascade                                                                                                                   | 1.03  | 4.99E-02 |
| ENSSSCG00000037792 | COX7A1  | cytochrome c oxidase subunit 7A1                | Oxidative phosphorylation                                                                                                                             | 1.04  | 4.22E-02 |
| ENSSSCG00000006107 | PDP1    | pyruvate dehydrogenase phosphatase              | Pyruvate metabolism and Citric Acid (TCA) cycle                                                                                                       | 1.06  | 3.45E-02 |

|                    |          |                                                          |                                                                                         |      |          |
|--------------------|----------|----------------------------------------------------------|-----------------------------------------------------------------------------------------|------|----------|
|                    |          | catalytic subunit 1                                      |                                                                                         |      |          |
| ENSSSCG0000002374  | DLST     | dihydrolipoamide S-succinyltransferase                   | Citrate cycle (TCA cycle)                                                               | 1.06 | 3.08E-02 |
| ENSSSCG00000016516 | ATP6V0A4 | ATPase H <sup>+</sup> transporting V0 subunit a4         | Oxidative phosphorylation                                                               | 1.06 | 4.09E-02 |
| ENSSSCG00000004172 | SLC2A12  | solute carrier family 2 member 12                        | Transport of glucose and other sugars                                                   | 1.07 | 3.54E-02 |
| ENSSSCG00000023818 | MRPS27   | mitochondrial ribosomal protein S27                      | Mitochondrial translation                                                               | 1.09 | 4.06E-02 |
| ENSSSCG00000015435 | NAMPT    | nicotinamide phosphoribosyltransferase                   | Adipogenesis                                                                            | 1.09 | 3.65E-02 |
| ENSSSCG00000035537 | RUNX1    | RUNX family transcription factor 1                       | Transport of glucose and other sugars                                                   | 1.11 | 1.92E-02 |
| ENSSSCG00000025901 | LCLAT1   | lysocardiolipin acyltransferase 1                        | Triacylglycerol biosynthesis                                                            | 1.11 | 1.91E-02 |
| ENSSSCG00000024015 | FADS1    | fatty acid desaturase 1                                  | Biosynthesis of unsaturated fatty acids                                                 | 1.14 | 1.96E-02 |
| ENSSSCG00000022197 | HS6ST1   | heparan sulfate 6-O-sulfotransferase 1                   | Glycosaminoglycan biosynthesis                                                          | 1.15 | 1.31E-02 |
| ENSSSCG00000029515 | PON3     | paraoxonase 3                                            | Metabolism of lipids and lipoproteins                                                   | 1.16 | 1.92E-02 |
| ENSSSCG00000033626 | SREBF1   | sterol regulatory element binding transcription factor 1 | Adipogenesis, Insulin signaling pathway                                                 | 1.16 | 3.61E-02 |
| ENSSSCG00000005719 | RAPGEF1  | Rap guanine nucleotide exchange factor 1                 | Insulin signaling pathway                                                               | 1.17 | 3.35E-02 |
| ENSSSCG00000014149 | MEF2C    | myocyte enhancer factor 2C                               | Adipogenesis                                                                            | 1.20 | 3.28E-02 |
| ENSSSCG00000027017 | NR1D2    | nuclear receptor subfamily 1 group D member 2            | carbohydrate and lipid metabolism                                                       | 1.21 | 4.87E-02 |
| ENSSSCG00000014437 | PPARGC1B | PPARG coactivator 1 beta                                 | Metabolism of lipids and lipoproteins                                                   | 1.22 | 8.79E-03 |
| ENSSSCG00000008629 | ROCK2    | Rho associated coiled-coil containing protein kinase 2   | Leptin signaling pathway                                                                | 1.26 | 3.42E-02 |
| ENSSSCG00000007507 | PCK1     | phosphoenolpyruvate carboxykinase 1                      | Glycolysis / Gluconeogenesis, Adipogenesis, PPAR signaling pathway, Pyruvate metabolism | 1.27 | 5.32E-03 |
| ENSSSCG00000013072 | FADS2    | fatty acid desaturase 2                                  | Biosynthesis of unsaturated fatty acids, PPAR signaling pathway                         | 1.29 | 1.03E-02 |

|                    |         |                                                       |                                                                                                |      |          |
|--------------------|---------|-------------------------------------------------------|------------------------------------------------------------------------------------------------|------|----------|
| ENSSSCG00000015617 | G0S2    | G0/G1 switch 2                                        | Metabolism of lipids and lipoproteins 、 Regulation of lipid metabolism                         | 1.30 | 1.13E-02 |
| ENSSSCG00000013399 | TEAD1   | TEA domain transcription factor 1                     | Metabolism of lipids and lipoproteins                                                          | 1.30 | 3.40E-03 |
| ENSSSCG00000006089 | PTDSS1  | phosphatidylserine synthase 1                         | Glycerophospholipid Biosynthetic Pathway                                                       | 1.31 | 1.08E-02 |
| ENSSSCG00000009889 | ALDH2   | aldehyde dehydrogenase 2 family member                | Fatty acid degradation、 Glycolysis / Gluconeogenesis、 Pyruvate metabolism                      | 1.34 | 4.94E-03 |
| ENSSSCG00000001906 | CYP1A1  | cytochrome P450 family 1 subfamily A member 1         | synthesis of cholesterol, steroids and other lipids                                            | 1.36 | 2.41E-02 |
| ENSSSCG00000010301 | PPP3CB  | protein phosphatase 3 catalytic subunit beta          | Glucagon signaling pathway                                                                     | 1.36 | 4.28E-03 |
| ENSSSCG00000007873 | ABCC6   | ATP binding cassette subfamily C member 6             | ABC transporters                                                                               | 1.36 | 6.72E-03 |
| ENSSSCG00000030643 | SELENOI | selenoprotein I                                       | Glycerophospholipid biosynthesis 、 Phosphatidylethanolamine (PE) biosynthesis                  | 1.39 | 9.12E-04 |
| ENSSSCG00000006328 | RXRG    | retinoid X receptor gamma                             | Adipocytokine signaling pathway 、 PPAR signaling pathway                                       | 1.41 | 1.62E-02 |
| ENSSSCG00000037559 | ACOT11  | acyl-CoA thioesterase 11                              | Fatty Acyl-CoA Biosynthesis 、 Triglyceride Biosynthesis                                        | 1.43 | 4.60E-04 |
| ENSSSCG00000009937 | ACACB   | acetyl-CoA carboxylase beta                           | Fatty acid biosynthesis、                                                                       | 1.45 | 3.62E-03 |
| ENSSSCG00000010947 | FBP2    | fructose-bisphosphatase 2                             | Glycolysis / Gluconeogenesis 、 Gluconeogenesis 、 Glucose metabolism、 Insulin signaling pathway | 1.46 | 2.85E-03 |
| ENSSSCG00000024814 | PFKFB1  | 6-phosphofructo-2-kinase/fructose-2,6-biphosphatase 1 | Gluconeogenesis、 Glucose metabolism                                                            | 1.48 | 5.58E-04 |
| ENSSSCG00000015356 | AGMO    | alkylglycerol monoxygenase                            | Metabolism of lipids and lipoproteins                                                          | 1.54 | 1.24E-03 |
| ENSSSCG00000005229 | VLDLR   | very low density lipoprotein receptor                 | Lipid digestion                                                                                | 1.56 | 4.63E-03 |
| ENSSSCG00000026554 | PRXL2B  | peroxiredoxin like 2B                                 | Metabolism of lipids and lipoproteins                                                          | 1.56 | 1.12E-04 |

|                    |          |                                                                       |                                                                                                          |      |          |
|--------------------|----------|-----------------------------------------------------------------------|----------------------------------------------------------------------------------------------------------|------|----------|
| ENSSSCG00000032498 | IDH3A    | isocitrate dehydrogenase (NAD(+)) 3 alpha                             | Citrate cycle (TCA cycle)、Pyruvate metabolism                                                            | 1.59 | 9.69E-05 |
| ENSSSCG00000038465 | VAPA     | VAMP associated protein A                                             | Metabolism of lipids and lipoproteins                                                                    | 1.65 | 2.04E-04 |
| ENSSSCG00000008803 | ATP8A1   | ATPase phospholipid transporting 8A1                                  | Ion channel transport                                                                                    | 1.67 | 1.38E-04 |
| ENSSSCG00000018023 | COX10    | cytochrome c oxidase assembly factor heme A:farnesyltransferase COX10 | Oxidative phosphorylation                                                                                | 1.69 | 1.78E-03 |
| ENSSSCG00000032911 | DUSP8    | dual specificity phosphatase 8                                        | Insulin receptor signalling cascade                                                                      | 1.75 | 8.99E-06 |
| ENSSSCG00000003154 | GYS1     | glycogen synthase 1                                                   | Glucose metabolism 、 Glycogen synthesis 、 Insulin signaling pathway、 Metabolism of carbohydrates         | 1.77 | 8.67E-06 |
| ENSSSCG00000011363 | PRKAR2A  | protein kinase cAMP-dependent type II regulatory subunit alpha        | Insulin signaling pathway 、 Glucagon signaling in metabolic regulation                                   | 1.77 | 5.25E-04 |
| ENSSSCG00000004419 | MFSD4B   | major facilitator superfamily domain containing 4B                    | Transport of glucose and other sugars, bile salts and organic acids, metal ions and amine compounds      | 1.80 | 3.66E-05 |
| ENSSSCG00000015949 | SLC25A12 | solute carrier family 25 member 12                                    | Glucose metabolism、 Gluconeogenesis                                                                      | 1.97 | 3.48E-07 |
| ENSSSCG00000029811 | PLCL2    | phospholipase C like 2                                                | lipid metabolic                                                                                          | 2.01 | 8.85E-08 |
| ENSSSCG00000014861 | MOGAT2   | monoacylglycerol O-acyltransferase 2                                  | Triacylglyceride Synthesis                                                                               | 2.05 | 9.47E-08 |
| ENSSSCG00000036614 | PGP      | phosphoglycolate phosphatase                                          | Carbon metabolism 、 Glyoxylate and dicarboxylate metabolism                                              | 2.10 | 1.55E-08 |
| ENSSSCG00000002873 | GPI      | glucose-6-phosphate isomerase                                         | Gluconeogenesis、 Glucose metabolism、 Glycolysis                                                          | 2.18 | 5.51E-09 |
| ENSSSCG00000001852 | IDH2     | isocitrate dehydrogenase (NADP(+)) 2                                  | Pyruvate metabolism and Citric Acid (TCA) cycle                                                          | 2.18 | 8.51E-09 |
| ENSSSCG00000015872 | GPD2     | glycerol-3-phosphate dehydrogenase 2                                  | Metabolism of lipids and lipoproteins                                                                    | 2.23 | 5.97E-08 |
| ENSSSCG00000038007 | HACD1    | 3-hydroxyacyl-CoA dehydratase 1                                       | Fatty acid biosynthesis                                                                                  | 2.28 | 4.60E-04 |
| ENSSSCG00000007744 | PHKG1    | phosphorylase kinase catalytic subunit gamma 1                        | Glucagon signaling pathway 、 Glucose metabolism 、 Insulin signaling pathway、 Metabolism of carbohydrates | 2.40 | 1.72E-05 |
| ENSSSCG00000039425 | BPGM     | bisphosphoglycerate mutase                                            | Glycolysis / Gluconeogenesis                                                                             | 2.56 | 2.60E-12 |

|                    |         |                                                            |                                                                                                              |      |          |
|--------------------|---------|------------------------------------------------------------|--------------------------------------------------------------------------------------------------------------|------|----------|
| ENSSSCG00000012440 | PGK1    | phosphoglycerate kinase 1                                  | Glycolysis / Gluconeogenesis、 Glucose metabolism                                                             | 2.57 | 5.24E-12 |
| ENSSSCG00000014838 | PGM2L1  | phosphoglucomutase 2 like 1                                | Starch and sucrose metabolism                                                                                | 2.60 | 5.04E-10 |
| ENSSSCG00000011698 | GYG1    | glycogenin 1                                               | Glucose metabolism、 glycogen biosynthesis、 Starch and sucrose metabolism                                     | 2.66 | 3.29E-09 |
| ENSSSCG00000002844 | PHKB    | phosphorylase kinase regulatory subunit beta               | Glucose metabolism、 Insulin signaling pathway、 Metabolism of carbohydrates                                   | 2.69 | 3.96E-13 |
| ENSSSCG00000010464 | PPP1R3C | protein phosphatase 1 regulatory subunit 3C                | Glucose metabolism、 Insulin signaling pathway、 Metabolism of carbohydrates                                   | 2.98 | 4.80E-16 |
| ENSSSCG00000001930 | PKM     | pyruvate kinase M1/2                                       | Carbon metabolism、 Glucose metabolism、 Glycolysis / Gluconeogenesis、 Pyruvate metabolism                     | 3.57 | 2.70E-07 |
| ENSSSCG00000003812 | PGM1    | phosphoglucomutase 1                                       | Glucose metabolism、 Glycolysis / Gluconeogenesis、 Metabolism of carbohydrates、 Starch and sucrose metabolism | 3.86 | 2.23E-21 |
| ENSSSCG00000000694 | GAPDH   | glyceraldehyde-3-phosphate dehydrogenase                   | Carbon metabolism、 Glycolysis / Gluconeogenesis                                                              | 4.25 | 5.69E-08 |
| ENSSSCG00000024018 | SLC16A3 | solute carrier family 16 member 3                          | Pyruvate metabolism and Citric Acid (TCA) cycle                                                              | 4.27 | 1.44E-11 |
| ENSSSCG00000013366 | LDHA    | lactate dehydrogenase A                                    | Glycolysis / Gluconeogenesis、 Pyruvate metabolism、 The citric acid (TCA) cycle                               | 4.41 | 4.00E-09 |
| ENSSSCG00000016200 | PRKAG3  | protein kinase AMP-activated non-catalytic subunit gamma 3 | key enzymes involved in regulating de novo biosynthesis of fatty acid and cholesterol                        | 4.44 | 2.35E-21 |
| ENSSSCG00000006872 | AGL     | amylo-alpha-1, 6-glucosidase, 4-alpha-glucanotransferase   | Glucose metabolism、 Metabolism of carbohydrates                                                              | 4.47 | 2.50E-17 |
| ENSSSCG00000012411 | PHKA1   | phosphorylase kinase alpha 1                               | Glucose metabolism、 Insulin signaling pathway                                                                | 4.72 | 1.83E-34 |
| ENSSSCG00000032556 | ALDOA   | aldolase, fructose-bisphosphate A                          | Carbon metabolism、 Glucose metabolism                                                                        | 5.08 | 5.16E-14 |
| ENSSSCG00000021129 | PFKM    | phosphofructokinase, muscle                                | Galactose metabolism、 Glucose metabolism、 Glycolysis / Gluconeogenesis                                       | 6.13 | 9.86E-26 |

|                    |       |                           |                |        |                                                                                                                                                        |      |          |
|--------------------|-------|---------------------------|----------------|--------|--------------------------------------------------------------------------------------------------------------------------------------------------------|------|----------|
| ENSSSCG00000016720 | PGAM2 | phosphoglycerate mutase 2 |                |        | Carbon metabolism、 Glucose metabolism、 Glycolysis / Gluconeogenesis 、 superpathway of conversion of glucose to acetyl CoA and entry into the TCA cycle | 8.32 | 2.91E-26 |
| ENSSSCG00000017904 | ENO3  | enolase 3                 |                |        | Glucose metabolism、 Carbon metabolism、 Glycolysis / Gluconeogenesis                                                                                    | 8.66 | 3.78E-28 |
| ENSSSCG00000013022 | PYGM  | glycogen associated       | phosphorylase, | muscle | Glucose metabolism 、 Insulin resistance 、 Starch and sucrose metabolism                                                                                | 9.15 | 1.41E-34 |

---

“+” and “-” in Log<sub>2</sub>(Fold change) indicate the up- and down-regulated expression in Songliao group, respectively



Table S9. DEGs overlap QTLs.doc

| Differentially expressed genes | Gene Symbl | QTL related to fat deposition and metabolism                                                           |
|--------------------------------|------------|--------------------------------------------------------------------------------------------------------|
| ENSSSCG0000000810              | AMIGO2     | meat fatty acid content                                                                                |
| ENSSSCG0000000811              | -          | meat fatty acid content                                                                                |
| ENSSSCG0000001068              | CAP2       | leaf fat weight, subcutaneous adipose thickness, back fat thickness, back fat thickness,               |
| ENSSSCG0000001493              | PRIM2      | meat fatty acid content,                                                                               |
| ENSSSCG0000001500              | -          | back fat thickness, intramuscular fat content                                                          |
| ENSSSCG0000001683              | POLH       | backfat thickness                                                                                      |
| ENSSSCG0000001852              | IDH2       | shoulder subcutaneous fat thickness                                                                    |
| ENSSSCG0000001873              | CSPG4      | meat fatty acid content                                                                                |
| ENSSSCG0000002285              | GPHN       | back fat thickness                                                                                     |
| ENSSSCG0000003582              | SMPDL3B    | backfat thickness                                                                                      |
| ENSSSCG0000003693              | MYOM1      | backfat thickness                                                                                      |
| ENSSSCG0000003768              | -          | back fat thickness                                                                                     |
| ENSSSCG0000004022              | RPS6KA2    | intramuscular fat content                                                                              |
| ENSSSCG0000004367              | POPDC3     | dressed carcass fat content, back fat thickness                                                        |
| ENSSSCG0000005229              | VLDLR      | abdominal fat weight, back fat weight                                                                  |
| ENSSSCG0000005713              | -          | dressed carcass fat percentage                                                                         |
| ENSSSCG0000005905              | SLC39A4    | backfat thickness                                                                                      |
| ENSSSCG0000006089              | -          | meat fatty acid content                                                                                |
| ENSSSCG0000006137              | WWP1       | meat fatty acid content                                                                                |
| ENSSSCG0000006160              | STMN2      | meat unsaturated fatty acid content, backfat at last rib                                               |
| ENSSSCG0000006218              | PDE7A      | backfat at first rib                                                                                   |
| ENSSSCG0000006338              | DDR2       | meat fatty acid content                                                                                |
| ENSSSCG0000006542              | -          | meat fatty acid content, meat unsaturated fatty acid content,                                          |
| ENSSSCG0000006872              | -          | back fat thickness, meat fatty acid content                                                            |
| ENSSSCG0000008446              | SIX2       | average backfat thickness                                                                              |
| ENSSSCG0000008991              | FRAS1      | back fat thickness                                                                                     |
| ENSSSCG0000009125              | -          | meat fatty acid content                                                                                |
| ENSSSCG0000009192              | -          | intramuscular fat content, meat fatty acid content                                                     |
| ENSSSCG0000009693              | XKR6       | average backfat thickness                                                                              |
| ENSSSCG0000010603              | NEURL1     | meat fatty acid content                                                                                |
| ENSSSCG0000011363              | PRKAR2A    | backfat thickness                                                                                      |
| ENSSSCG0000011367              | ARIH2      | average backfat thickness                                                                              |
| ENSSSCG0000012371              | AR         | back fat thickness                                                                                     |
| ENSSSCG0000013022              | PYGM       | average backfat thickness                                                                              |
| ENSSSCG0000013043              | MACROD1    | meat fatty acid content, subcutaneous adipose thickness, intramuscular fat content, back fat thickness |

|                    |           |                                                                  |
|--------------------|-----------|------------------------------------------------------------------|
| ENSSSCG00000013101 | MS4A4A    | average backfat thickness                                        |
| ENSSSCG00000015402 | CACNA2D1  | belly fat area                                                   |
| ENSSSCG00000015617 | G0S2      | meat polyunsaturated fatty acid content                          |
| ENSSSCG00000015917 | XIRP2     | intramuscular fat content                                        |
| ENSSSCG00000016685 | -         | meat fatty acid content                                          |
| ENSSSCG00000016722 | UBE2D4    | meat lipid content                                               |
| ENSSSCG00000016956 | -         | meat fatty acid content                                          |
| ENSSSCG00000017282 | -         | meat fatty acid content, fat percentage in carcass               |
| ENSSSCG00000018007 | LOC396711 | intramuscular fat content,                                       |
| ENSSSCG00000020785 | DES       | intramuscular fat content                                        |
| ENSSSCG00000022945 | -         | average backfat thickness                                        |
| ENSSSCG00000023296 | -         | meat fatty acid content                                          |
| ENSSSCG00000026164 | SOHLH2    | average backfat thickness                                        |
| ENSSSCG00000027992 | MST1R     | meat oleic acid content, meat monounsaturated fatty acid content |
| ENSSSCG00000028052 | OBSL1     | intramuscular fat content                                        |
| ENSSSCG00000028172 | FAM78A    | dressed carcass fat percentage                                   |
| ENSSSCG00000028420 | EIF4E     | meat fatty acid content                                          |
| ENSSSCG00000029441 | -         | intramuscular fat content, total body fat weight                 |
| ENSSSCG00000030643 | SELENOI   | average backfat thickness                                        |

---

Table S10. The result compared with previous similar reports

| Previous reports            | similar | Common DEGs      | Log <sub>2</sub> FC in this study | Log <sub>2</sub> FC in previous reports | Description                                           |                                               |       |                           |
|-----------------------------|---------|------------------|-----------------------------------|-----------------------------------------|-------------------------------------------------------|-----------------------------------------------|-------|---------------------------|
| Jeju Native Pig (obesity)   | VS.     | COL11A2          | -1.02                             | -93.49                                  | collagen type XI alpha 2 chain                        |                                               |       |                           |
|                             |         | Berkshire (lean) | PPL                               | -1.56                                   | 5.92                                                  | periplakin                                    |       |                           |
|                             |         |                  | CCL4                              | 1.40                                    | -11.20                                                | CCR-like protein 4                            |       |                           |
|                             |         |                  | FMO1                              | 1.56                                    | -4.03                                                 | flavin containing monooxygenase 1             |       |                           |
|                             |         |                  | ITGA8                             | 1.57                                    | -4.86                                                 | integrin alpha 8                              |       |                           |
|                             |         |                  | LCN2                              | 1.78                                    | -6.95                                                 | lipocalin 2                                   |       |                           |
| Korean native pig (obesity) | VS.     | CPEB4            | -2.63                             | 1.87                                    | cytoplasmic polyadenylation element binding protein 4 |                                               |       |                           |
|                             |         | Yorkshire (lean) | DBNDD2                            | -1.05                                   | 1.49                                                  | dysbindin domain containing 2                 |       |                           |
|                             |         |                  | FBP2                              | -1.24                                   | 1.58                                                  | Fat body protein 2                            |       |                           |
|                             |         |                  | NR4A3                             | -2.04                                   | 4.70                                                  | nuclear receptor subfamily 4 group A member 3 |       |                           |
|                             |         |                  | PDE4D                             | -2.51                                   | -1.56                                                 | phosphodiesterase 4D                          |       |                           |
|                             |         |                  | SLC25A4                           | -1.63                                   | -2.03                                                 | solute carrier family 25 member 4             |       |                           |
|                             |         |                  | TPM2                              | -3.80                                   | 2.17                                                  | tropomyosin 2                                 |       |                           |
|                             |         |                  | A2M                               | 1.18                                    | 4.11                                                  | alpha-2-macroglobulin                         |       |                           |
|                             |         |                  | C4BPA                             | 1.07                                    | -2.43                                                 | complement component 4 binding protein alpha  |       |                           |
|                             |         |                  | CES3                              | 2.70                                    | 1.46                                                  | carboxylesterase 3                            |       |                           |
|                             |         |                  | GMFG                              | 1.01                                    | 1.62                                                  | glia maturation factor gamma                  |       |                           |
|                             |         |                  | Rongchang piglet (obesity)        | VS.                                     | FOS                                                   | -2.18                                         | 6.47  | FBJ osteosarcoma oncogene |
|                             |         |                  |                                   |                                         | Landrace (lean)                                       | CLDN7                                         | -1.41 | 2.78                      |
| RCAN1                       | -1.88   | 3.77             |                                   |                                         |                                                       | regulator of calcineurin 1                    |       |                           |
| TRIM63                      | -3.80   | 2.68             |                                   |                                         |                                                       | tripartite motif containing 63                |       |                           |
| CLEC7A                      | 1.21    | 8.99             |                                   |                                         |                                                       | C-type lectin domain family 7, member a       |       |                           |
| HES6                        | -1.06   | 2.82             |                                   |                                         |                                                       | hes family bHLH transcription factor 6        |       |                           |
| OLR1                        | 1.30    | 3.14             |                                   |                                         |                                                       | oxidized low density lipoprotein receptor 1   |       |                           |
| S100A4                      | 1.51    | 4.44             |                                   |                                         |                                                       | S100 calcium binding                          |       |                           |

|                  |              |         |       |       |                                                  |
|------------------|--------------|---------|-------|-------|--------------------------------------------------|
| Italian          | Large        | HSPB8   | -5.10 | -.181 | protein A4                                       |
| White pigs with  | high backfat | GMFG    | 1.01  | 1.23  | heat shock protein family B (small) member 8     |
| thickness        | (obesity)    | VS. LYZ | 2.41  | 2.03  | glia maturation factor gamma                     |
| Italian          | Large        | OLR1    | 1.30  | 1.26  | lysozyme                                         |
| White pigs with  | low backfat  | PADI2   | 1.02  | 1.6   | oxidized low density lipoprotein receptor 1      |
| thickness (lean) |              | ST14    | 1.16  | 1.79  | peptidyl arginine deiminase 2                    |
|                  |              | STMN2   | 1.32  | 1.85  | suppression of tumorigenicity 14 stathmin-like 2 |

Table S11. Forward and reverse primers used for qPCR validation of 7 genes from RNASeq.

| Gene  | Primer Sequences for qPCR (5'-3')                | Amplicon length (bp) |
|-------|--------------------------------------------------|----------------------|
| PGM1  | F GATCCTGTGGACGGAAGCAT<br>R ATGTACAGTCGGATGGTGGC | 122                  |
| LDHA  | F AGTGCACTCCCGATTCCCTT<br>R AACAGCACCAACCCCAACAA | 129                  |
| PGK1  | F GCTGGACGTGAAGGGAAAGA<br>R CTGACTTGGCTCCGTTGTCT | 140                  |
| ABCA4 | F AAATGACGCACGACTTCCCT<br>R AACCTGGAGGCACCTATCCT | 142                  |
| LNC2  | F GTCAGGTGGACGGACCATAAA<br>R GCCACAGGAGACTTAGGGC | 126                  |
| VDR   | F TGGTTGGAAGTGTCTGGGAG<br>R GGCACATTCCGGTCAAAGTC | 140                  |
| ACACB | F CCCGACCATGTTTGTCTCA<br>R GGTGAGGCGGTAAGTGTGA   | 145                  |
| GAPDH | F GGGCATGAACCATGAGAAGT<br>R AAGCAGGGATGATGTTATGG | 230                  |
